# Supplementary material for: Precision-mapping and statistical validation of quantitative trait loci by machine learning
Source: PubMed Central journal article supplement (PMC2409372; doi:10.1186/1471-2156-9-35), 2008-05-02
Supplement: 1471-2156-9-35-S1.pdf [file 1471-2156-9-35-S1.pdf]

**Additional File 1.** List of QTL identified using Statistical Machine Learning (SML), single Marker Regression (MR) and Composite Interval Mapping (CIM). The analyses were performed using the segregation data of the crude map (Additional File 2).

| Trait                 | SML                                                                       | MR                                                                                                               | CIM >10cM                                                                                                         |
|-----------------------|---------------------------------------------------------------------------|------------------------------------------------------------------------------------------------------------------|-------------------------------------------------------------------------------------------------------------------|
| <i>α</i> -Amylase     | 1H (113.8), 2H (93.1), 3H (20.6), 5H (68.2, 94.4, 183.9), 7H (68.6, 96.4) | 1H (96.3, 113.8), 2H (84.9), 3H (36.2), 4H (127.1), 5H (68.1, 135.4, 178.0), 6H (23.7), 7H (68.6, 137.3)         | 1H (126.4), 2H (84.9), 3H (8.9, 25.0, 115.3), 4H (127.1), 5H (65.7, 94.4, 182.8), 7H (68.6, 96.5)                 |
| Diastatic power       | 1H (1.5), 2H (134.4), 3H (38.5), 4H (1.1), 5H (80.8), 7H (67.0)           | 1H (1.5, 57.6, 108.1), 2H (83.7, 131.0), 3H (36.2, 78.9), 4H (1.1, 127.1), 5H (68.5), 6H (36.5, 77.2), 7H (67.0) | 1H (1.8, 71.7), 2H (10.4, 35.2, 135.4), 3H (36.2, 112.1), 4H (1.1, 127.1), 5H (79.8, 140.4), 6H (80.4), 7H (61.5) |
| Malt extract          | 2H (133.2), 4H (86.6), 5H (179.1), 7H (68.6)                              | 1H (1.5, 48.9), 2H (78.6, 93.1, 134.4), 3H (168.9), 4H (90.1), 5H (127.2, 177.2), 6H (23.7), 7H (68.6)           | 1H (1.7, 50.1, 132.0), 2H (4.2, 128.9), 3H (22.8), 4H (90.6, 145.7), 5H (99.3, 181.6), 7H (23.8, 70.1)            |
| Heading date          | 2H (91.2, 117.8)                                                          | 1H (1.1), 2H (71.9, 121.3), 7H (120.0)                                                                           | 1H (135.9), 2H (91.2, 121.3), 3H (86.6, 173.3), 4H (0.0, 85.5), 7H (107.7)                                        |
| Plant height          | 2H (117.8), 3H (117.4), 5H (68.1)                                         | 1H (35.5, 91.1), 2H (14.8, 46.7, 118.9), 3H (117.4), 4H (142.2), 5H (71.5, 177.2), 6H (149.4), 7H (53.4)         | 2H (22.5, 91.2, 120.7), 3H (117.4), 4H (78.6, 92.6), 5H (68.1), 6H (144.1), 7H (52.8)                             |
| Lodging               | 2H (5.9, 95.1), 3H (115.3), 4H (34.1), 6H (60.6), 7H (46.6)               | 2H (15.5, 94.1), 3H (115.3), 4H (35.7, 51.7, 60.5, 142.2), 5H (48.3), 7H (77.6)                                  | 2H (5.2, 94.2, 112.5), 3H (16.3, 42.1, 117.4), 4H (39.6), 5H (13.0, 71.5), 6H (97.3), 7H (46.5, 89.0, 143.4)      |
| Pubescent leaves      | 3H (38.5)                                                                 | 2H (82.7, 143.7), 3H (38.5), 4H (127.1), 5H (0, 10.8, 131.4)                                                     | 3H (42.1)                                                                                                         |
| Grain protein content | 2H (3.8, 93.1), 3H (117.4, 158.4), 4H (34.1), 5H (46.5, 137.1)            | 2H (95.1), 3H (74.5, 115.3), 5H (37.6, 51.3, 125.6, 133.0), 6H (104.9)                                           | 2H (46.7, 94.2), 3H (78.9, 138.9, 160.1), 4H (41.6, 58.7), 5H (51.3, 84.2, 136.5), 7H (49.8, 118.7)               |
| Yield                 | 3H (115.3)                                                                | 1H (113.8, 135.9), 2H (66.3), 3H (115.3), 4H (18.6, 42.7), 5H (1.1, 54.4, 156.8), 6H (9.8), 7H (22.5, 117.6)     | 3H (117.4), 4H (42.7), 5H (54.5, 93.6)                                                                            |
